# Supplementary material
Source: PubMed Central journal article supplement (PMC123139)
Supplement: supp_142287799_2877Fig6.pdf [file supp_142287799_2877Fig6.pdf]

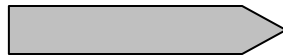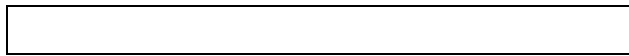

```

Oas1a -----MEHGERSIPAWTLDKFIEDYLLPDTTFGADVKSAVNVVDFLKERCFQGAH---PVRVSKVVKGSSGKETTAKGKSDADLVVFLNNLTSFEDQLNRR
Oas1g -----MEHGERSIPAWTKDKFIEDYLLPDTTFGADVKSAVNVVDFLKERCFQGAH---PVRVSKVVKGSSGKETTAKGKSDADLVVFLNNLTSFQDQLNRR
Oas1a_rat -----MEQE LRSIPSWKLDKFI EYVLLPNTSFRDDVKSAINVLCDFLKERCFRDTVH---PVRVSKVVKGSSGKETTAKGKSDADLVVFLNNLTSFEDQLNRR
Oas1b_rat -----MEQE LRSIPASKLDQFIEVH-LPDISFRDELREVIDVLCILLKNRCCRESSH---PVRTSKVKGKSSGKETTAKGKSDADLVVFLDSFTFCFGDQLNRR
Oas1b -----MEQD LRSIPASKLDKFIENH-LPDTSFCA DLREVIDALCALLKDRFFRGPVR---RMRASGKVK---GKQTA D KGRSDADLVVFLNNLTSFEDQLNQ
Oas1d -----MARE LFRTPWRDLKFI EDQLLPDTTFTEL RADIDSISAF LKERCFQGAH---PVRVSRVVGGC VNEVTVLKRSEANMVVFLINLTSFEDQFNQ
Oas1e -----MARE LFRTPWRDLNFIEDQLLPDTTFTEL RADIDSISAF LKERCFQGAH---PMRVSRVVGGSD EHNAL KGRSEANMVVFN DLTSFEDQLKWQ
Oas1c -----MENG LCSIQARELDEFICDYLPDTTFTEL RADIDSISAF LKERCFQGAH---PVRVSRVVGGSD EHTAD KSKSEAKMVVFLNNLTSFEEQLKRR
Oas1f -----MVKD LSSTPACELDKFIRDHLLPDS SFHAEARADVDFI GAFLKERCFQGAH---PVRVSRVVGGSD EHTAD KSKSEAKMVVFLNNLTSFEEQLKRR
Oas1h -----MAKNLSSTRIALCSTPAWRLDKFIEGHLLGDITFLTELRTDVNSISAF LKERCFQGAH---PMRVSRVVGGSNRNVTVLKRSEV DDLVFFNNLTCFPDQFKLQ
OAS1 -----MMDLRNTPAKSLDKFIEDYLLPDTCFRMDIHAIDIICGFLKERCFRGSY---PVCVSKVVKGSSGKETTAKGKSDADLVVFLPLTFDQDLNRR
OAS2C -----APLFTTPEGHLLDKFIEKFLQPNKCFLEQIDSAVNIIRTF LKENCFRQS---TAKIQIVRGGSPAKCTADKRGSDADLVVFNHSLKSYTSQKNER
Oas2C -----MPLFVTPSHLLNKFIKDFLQPNKFLKQIKEAVDIIICF LKNVCF LNSD---TKV LKTVKGSSPAKCTADKRGSDADIVVFLSLESYDSLKTNR
OAS3C -----MPALLYQTPAGDLDKFISEFLQPNRQFLAQVKNRAVDITCSFLKENCFRNSP---IKV LKVVKGSSPAKCTADKRGSDADLVVFLSFCFSQFTEQGNKR
Oas3C -----TPALHQTLAEDLDKFI SEFLQPNRHF LTVKRAVDITCSFLKENCFRNST---IKV LKVVKGSSPAKCTADKRGSDADLVVFLSFCFSQFTEQGNKR
Oas11 -----MAVAQE LYGFPASKLDSFVAQWLQPTREWKEEVLETVQTVEQFLRQENFREDRGPARDVRLKVLKVGCCGNGTVDRSTTDV LVLVFLSFCFSFQEAKHH
OASL -----MALMQE LYSTPASRLDSFVAQWLQPHREWKEEVLDVARTVEEFLRQEHFQGRGLDQDVRV LKVVKGSSGNGTVDRSTREVELVFLSFCFSFQEAKHH
OAS2 -----MDPFPDLYATPEGSLDHFLEHSLQPRDWKEEGD AWERIERFRFREQCFRDELLDQDVRV LKVVKGSSGKETTAKGKSDADLVVFLSFCFSFQEAKRR
OAS2N -----MNGGESQLSSVPAQKLGWFIQEY LKPYEECQTLIDEMVNTICDVCRNP-----EQFPLVQVADGGSGRKTVDLRNSDGLVLFVFDLQFQDKRSQ
OAS2N -----MGNWLTGNWSSDRSSGYSYSGWSPGGSSGVPSPVHKLEKSIQANLTPNENCLKQIAYSSVPAQKLEGYIQENLKNRESLKI DQAVDAI WDLRSQIP-----VKEVAKGSSVGRCTADKRGSDADLVVFLSFCFSFQDQIKYQ
OAS3N -----MDLYSTPAALDRFVARLQPRKEFVEKARRALGALAAALREGRGLGAA---APRV LKTVKGSSGRC TADKRGSDADLVVFLSFCFSFQDQARR
Oas3N -----MDL FHTPAGALDKLVAHNLHPAEPFTA AVRGALGSLNITLQQRHAR-GSQ---RPRVIRI AKGAMARCTADKRGSDADLVVFLSFCFSFQDQKTC
OAS3M -----MALDLSQIPTKELDRFIQDHLKPSPFQEQVKAIDIILRCLHENC---VHKASRVSKGSSGRC TADKRGSDADLVVFLSFCFSFQDQKTC
Oas3M -----MSPFDLSQIPSKDLDCFIDHLRPSPFQEQVKAIDAILCCLREKS---VYKVL RSKGSSGRC TADKRGSDADLVVFLSFCFSFQDQKTC

```

LxxxP motif

P-loop motif

DAD motif

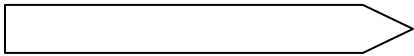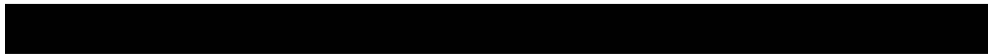

```

Oas1a -----GEFIKEIKKQLYEVQH---ERRFRVKFEVQSSWPNARSLSFKLSAP-HLHQEVEFDVLPADFVLGHVNTSSKPD---PRIYAILIEEC-TSLGKDG EFSTCFTELQRNFKQRPTKLSLIRLVKHWYQLCKEKLKGP-----LPPQYA
Oas1g -----GEFIKEIKKQLYEVQH---ERHFRVKFEVQSSWPNARSLSFKMSAP-HLHQEVEFDVLPADFVLGHGSINKKPN---PLIYTLIIEWEC-TSLGKDG EFSTCFTELQRNFKQRPTKLSLIRLVKHWYQLCKEKLKGP-----LPPQYA
Oas1a_rat -----GEFIKEIKKQLYEVQR---EKHFRVKFEVQSSWPNRALSFKLSAP-HLQEQEVEFDVLPAYDVLGHVLSYNSPD---PKIYTLIIEEC-ISLGDKEGFSTCFTELQRNFKQRPTKLSLIRLVKHWYQLCKEKLKGP-----LPPQYA
Oas1b_rat -----GEFTKEIKKLEFEVQR---DRHIGMKIEVHSSWSPNRALSFKLSAP-DQKQEVKFDVLPAYDVLGHVSI PRKPN---PHFYAIFISER-NSLGEDEFSTCFTELQLYFLNWRPTKLSLIRLVKHWYQLCKEKLKGP-----LPPQYA
Oas1b -----GVLIKEIKKQLYEVQH---ERRFGVKFEVQSLRSPNSRALSFKLSAP-DLLKEVKFDVLPAYDVLGHVNLKKNP---QQFYANLISGR-TPLGKEGKLLTCF MGLRKYFLNCRPTKLRILHLVTHWYQLCKEKLKGP-----LPPQYA
Oas1d -----VVFIEE IWRHLLQLQQ---EKLC LKFEVQSPKEPNRSLSFKLSCP-ERQHELEFDVQPAYDALYEVRRHFPPDSSYNNKVAQYLTHEC---TTLKEGEGFSICF TDLHQSF LRYRAPKLWNLIRLVKHWYQLCKEKLKGP-----LPPQYA
Oas1e -----QVFIEEIRKHLQLQQ---EKPC LKFEVQSS EEPNTRSLTFKLSCP-ERQEQEVEFDVQPAYDALYEGGYCKSFESINYNKVAQYLTHEC---TTLKEGEGFSICF TDLHQSF LRYRAPKLWNLIRLVKHWYQLCKEKLKGP-----LPPQYA
Oas1c -----GEFVEEIQKHLQQLQQ---EKPFVKFEVQSS EEPNRSLSFKLSSP-ELQEQEVEFDVQPAYDVLYELRNNTYAEFPQYNNKVAQYLTHEC---TTLKEGEGFSICF TDLHQSF MRYRAPKLWNLIRLVKHWYQLCKEKLKGP-----LPPQYA
Oas1f -----GEFTEEIRKHLQQLQD---EKPFVKFEVQSS EEPNRSLSFKLSSP-ELQEQEVEFDVQPAYDVLYELRNNTYAEFLYNNKVAQYLTHEC---TTLKEGEGFSICF TDLHQSF LEDRAPKLKNLIRLVKHWYQLCKEKLKGP-----LPPQYA
Oas1h -----KEVIEEIQKHLQCFQ---EKRLREKFKVQSSDQPNFRSVSFKLSY-PKQEQEVEFMQATAYDALYEVRRKENHNCEIYNKVAQYLIREC---TMLGKEGFNCFMELQDQDFLWKRPCBLKNLIRLVKHWYQLCKEKLKGP-----LPPQYA
Oas1 -----GEFIQEIRRQLEAQR---ERALS VKFEVQAPRWGNRALSFKLSL-QLGEGVEFDVLPADFALQLTGSYKPN---PQIVVKLIEEC-TDLGKEGFSTCFTELQRDFLQRPTKLSLIRLVKHWYQCNCKKLGK-----LPPQYA
OAS2C -----HKIVKEIHEQLKAFWREKBEELVSEFEP---PKWKAPRVLSFSLKSK-VLNE SVSFDVLP AFNALQ LSSGSTPS---PEVYAGLIDLYKSSDLPCEGFSTCF TDLQRNFI RSRPTKLDLIRLVKHWYKCEKRLKPKGS-----LPPKYA
Oas2C -----SQVFQEIQKQLEEFVQ---AQEW E VTFE I---SKWKAPRVLSFTLKS-KVLNESVEFDVLPAYDALGQLRSDFTLR---PEAYKDLIELCASQDIKEGFSTCFTELQRNFIQTRPTKLSLIRLVKHWYQYERKMKPKAS-----LPPKYA
OAS3C -----AEIIEIRAQLEAQQ---ERQFEVKFEV---SKWENPRVLSFSLTSQTMLDQSDVDFVLPADFALGQLVSGSRPS---SQYVDLIHSY---SNAGEYSTCFTELQRDFIISRPTKLSLIRLVKHWYQCTIKSGRGS-----LPPQHG
Oas3C -----AEIIEIRAQLEAQQ---THSFDVKFEV---SKRKNPRVLSFTLTSQTLLDQSDVDFVLPADFALGQLRSGSRPD---PRVYTDLIHS---CNAGEYSTCFTELQRDFISRPTKLSLIRLVKHWYQCNKTIKGGKS-----LPPQH
OAS11 -----QAVLRLIQKRMYYCQELMDLGLSNLSVTN---RVPSLLIFTIQTRT---WETITVTVVPAYRALG-PSCPSS-----EVYANLIKAN---GYPGNFSPSFSFELQRNFVKHRRPTKLSLIRLVKHWYQYVRDKCPR-AN---LPPLYA
OASL -----KDVLR L IWKTMWQSDLLDLGLD L RMEQ---RVPDALVFTIQTRGT---AEPITVTVVPAYRALG-PSLPNSQP---PEVYVSLIKAC---GGPGNFCPSFSELQRNFVKHRRPTKLSLIRLVKHWYQYVYKARS-AN---LPPLYA
OAS12 -----EVVISFKRLLHCSRSRLAYNIIVLTHREGKRAPRS LTKVQSRKT---DDIIMMDLIPAYDALG-PISRDSQP---APAIYETLIRSK---GYPGDFSPSFTLQRHFVKTREPVKLNLR LRVKFWYQLCLRRKYRGAV---LPSKYA
OAS2N -----RDILDKTGDKLFCFLFTKMLKNN- FEIQK---SLDGSTIQVFTK---NQRISFEVLA AFNALS LNDNPSPCI---YRELKRS LDKTN---ASPGEFAVCFTELQKFFDNRPGLKDLILLIKHWYQYQCK-1KDLF---SLSPYA
Oas2N -----DAYLD-----VIELWLKIEHKSVK---HEHALVQVQVSP---QORILLQLLPVFNLRNSNENPSSCV---YVDLKSMDQVR---ASPGEFSDCFTTLQQRFFKYPRLKDLILLIKHWYEQCQEK-WKTPPP---QPLLYA
OAS3N -----AEILSEMRASLESWQNPVGLRLTFPEQS---VPGALQFRLTSV-DLEDMDVSLVPAFVNLGQAGSAPVKP---PQVYSTLLNSG---CQGEHAACFTELRRNFVNI RPAKLN LIRLVKHWYHQVCLQGLWK---ETLPPVYA
Oas3N -----SETLGMARMLLESWGHGPGPLTFEFSQSK---ASRILQFRLASA-DGEHNI DVSLVPAFVNLGQPRSGVKTPT---PNVYSLLSSH---CQAGEYSACFTEPRKNFVNTRPAKLN LIRLVKHWYHQVQTVR---ATLPPSYA
OAS3M -----AEILDEMRAHVESWWDQVPSLSLQFPEQN---VPEALQFLVST-ALKSWTDVSLP AFDAVGQLSSGKTPN---PQVYRLLTSG---CQEGEHKACFAELRRNFVNI RPAKLN LIRLVKHWYRQVAAQKGGKGPAPASLPPYA
Oas3M -----AEILRDMQAQLRHWCQNVPGLSLQFIEQ---KPNALQLQLAST-DLSNRV DLSVLP AFDAVGKPSGKTKPQ---PQVYSLLSSG---CQAGEHAACFAELRRNFINTCPKLSLMLLIRLVKHWYRQVTVRYKGEAAGDAPPYAY

```

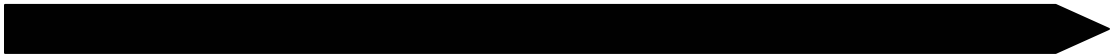

Oas1a LELLTVFAWEQ-GNGCYEFNTAQQFRTVLELVINYQHLRIYWKYDFQHQEVSKYLHRQLRKARPVILDPADPTGNVAGGNEGWRRLAEEADVWLWYPCFKIKDGSRVSSWDVPTVVVFPFQVEENWTCILL-----  
Oas1g LELLTVYAWEQ-GNGCNEFNNTAQQFRTVLELVINYQHLRIYWKYDFQHKEVSKYLHRQLRKARPVILDPADPTGNVAGGNEGWRRLAEEADVWLWYCFMKNDGSRVSSWDVPTVVVFPFQVEENWTCILL-----  
Oas1a\_rat LELLTVYAWER-GNGITEFNNTAQQFRTVLELVINYQHLRIYWKYDFQHDPVSKYLHRQLRKARPVILDPADPTGNVAGGNEGWRRLAEEADVWLWYCFMNRGGSPVSSWEVPE-----VDEAWSCILL-----  
Oas1b\_rat LELLTVYAWER-GGRLTKFNNTAQQFRTVLELVINYQHLRIYWKYDFQHDPVSKYLHRQLRKARPVILDPADPTGNVAGGNEGWRRLAEEADVWLWYCFMNRGGSPVSSWEVPE-----VDEAWSCILL-----  
Oas1b LELLTVYAWER-GSRVTKFNNTAQQFRTVLELVINYQHLRIYWKYDFQHDPVSKYLHRQLRKARPVILDPADPTGNVAGGNEGWRRLAEEADVWLWYCFMNRGGSPVSSWEVPE-----VDEAWSCILL-----  
Oas1d LELLTVYVWEYGIHENPGLHTAQQFRTVLELVINYQHLRIYWKYDFQH-EISDYLQGGQIKKARPLIILDPADPTGNVAGGNEGWRRLAEEADVWLWYCFMNRGGSPVSSWEVPE-----VDEAWSCILL-----  
Oas1e LELLTVYVWEYGIHENPGLHTAQQFRTVLELVINYQHLRIYWKYDFQH-EISDYLQGGQIKKARPLIILDPADPTGNVAGGNEGWRRLAEEADVWLWYCFMNRGGSPVSSWEVPE-----VDEAWSCILL-----  
Oas1c LELLTVYVWEHNSKNQEKVTTAKNFRTVLELVINYQHLRIYWKYDFQH-EISDYLQGGQIKKARPLIILDPADPTGNVAGGNEGWRRLAEEADVWLWYCFMNRGGSPVSSWEVPE-----VDEAWSCILL-----  
Oas1f LELLTVYAWESGSRD-CEFNNTAQQFRTVLELVINYQHLRIYWKYDFQHDPVSKYLHRQLRKARPVILDPADPTGNVAGGNEGWRRLAEEADVWLWYCFMNRGGSPVSSWEVPE-----VDEAWSCILL-----  
Oas1h LELLTVYAWEHLPDKHETQARGFRTVLELVINYQHLRIYWKYDFQHDPVSKYLHRQLRKARPVILDPADPTGNVAGGNEGWRRLAEEADVWLWYCFMNRGGSPVSSWEVPE-----VDEAWSCILL-----  
Oas1 LELLTVYAWER-GSMKTHFNNTAQQFRTVLELVINYQHLRIYWKYDFQKNIIEKYLRLQTKRPRVILDPADPTGNVAGGNEGWRRLAEEADVWLWYCFMNRGGSPVSSWEVPE-----VDEAWSCILL-----  
OAS2C LELLTVYAWEQ-GSGVPPDFDAEGFRTVLELVINYQHLRIYWKYDFQH-EISDYLQGGQIKKARPLIILDPADPTGNVAGGNEGWRRLAEEADVWLWYCFMNRGGSPVSSWEVPE-----VDEAWSCILL-----  
Oas2C LELLTVYAWEQ-GSGTDDFDIAEGLRVLVLDLVIKYRQLCIWTVNINFEDEEYMRKFLITQIKKARPVILDPADPTGNVAGGNEGWRRLAEEADVWLWYCFMNRGGSPVSSWEVPE-----VDEAWSCILL-----  
Oas3C LELLTVYAWEQ-GGKDSQFNMAEGFRTVLELVINYQHLRIYWKYDFQH-EISDYLQGGQIKKARPLIILDPADPTGNVAGGNEGWRRLAEEADVWLWYCFMNRGGSPVSSWEVPE-----VDEAWSCILL-----  
Oas3C LELLTVYAWEQ-GGQNPQFNMAEGFRTVLELVINYQHLRIYWKYDFQH-EISDYLQGGQIKKARPLIILDPADPTGNVAGGNEGWRRLAEEADVWLWYCFMNRGGSPVSSWEVPE-----VDEAWSCILL-----  
Oas11 -ELLTVYAWAEGTREDANFRLEGLATVMEQLLQDHELLCIYWKYDFQH-EISDYLQGGQIKKARPLIILDPADPTGNVAGGNEGWRRLAEEADVWLWYCFMNRGGSPVSSWEVPE-----VDEAWSCILL-----  
OASL LELLTVYAWEMGTEDENFMDLDEGFTVMDLLEVEVICIYWKYDFQH-EISDYLQGGQIKKARPLIILDPADPTGNVAGGNEGWRRLAEEADVWLWYCFMNRGGSPVSSWEVPE-----VDEAWSCILL-----  
Oas12 LELLTVYAWEMGTEDENFMDLDEGFTVMDLLEVEVICIYWKYDFQH-EISDYLQGGQIKKARPLIILDPADPTGNVAGGNEGWRRLAEEADVWLWYCFMNRGGSPVSSWEVPE-----VDEAWSCILL-----  
OAS2N LELLTVYAWEQGCRK-DNFDAEGVRTVLELVINYQHLRIYWKYDFQH-EISDYLQGGQIKKARPLIILDPADPTGNVAGGNEGWRRLAEEADVWLWYCFMNRGGSPVSSWEVPE-----VDEAWSCILL-----  
Oas2N LELLTVYAWEQGCRK-DNFDAEGVRTVLELVINYQHLRIYWKYDFQH-EISDYLQGGQIKKARPLIILDPADPTGNVAGGNEGWRRLAEEADVWLWYCFMNRGGSPVSSWEVPE-----VDEAWSCILL-----  
Oas3N LELLTVYAWEQGCKK-DAFSLGEGRLTVLGLIQHQLCVFVTVNINFEDEEYMRKFLITQIKKARPVILDPADPTGNVAGGNEGWRRLAEEADVWLWYCFMNRGGSPVSSWEVPE-----VDEAWSCILL-----  
Oas3N LELLTVYAWEQGCKK-DAFSLGEGRLTVLGLIQHQLCVFVTVNINFEDEEYMRKFLITQIKKARPVILDPADPTGNVAGGNEGWRRLAEEADVWLWYCFMNRGGSPVSSWEVPE-----VDEAWSCILL-----  
OAS3M LELLTVYAWEQGCRQ-DCFNMAQQFRTVLELVINYQHLRIYWKYDFQH-EISDYLQGGQIKKARPLIILDPADPTGNVAGGNEGWRRLAEEADVWLWYCFMNRGGSPVSSWEVPE-----VDEAWSCILL-----  
Oas3M LELLTVYAWEQGCGE-QKFSLAEGRLTILRLIQHQLCVFVTVNINFEDEEYMRKFLITQIKKARPVILDPADPTGNVAGGNEGWRRLAEEADVWLWYCFMNRGGSPVSSWEVPE-----VDEAWSCILL-----

CFK motif

|           |                                                                                                                                  |           |
|-----------|----------------------------------------------------------------------------------------------------------------------------------|-----------|
| Oas1a     | -----                                                                                                                            | CAA28620  |
| Oas1g     | -----                                                                                                                            | AAH18470  |
| Oas1a_rat | -----                                                                                                                            | CAA79317  |
| Oas1b_rat | -----                                                                                                                            | AAC19135  |
| Oas1b     | -----                                                                                                                            | AAH12877  |
| Oas1d     | -----                                                                                                                            | BAB84132  |
| Oas1e     | -----                                                                                                                            | BAB84131  |
| Oas1c     | -----                                                                                                                            | NP_291019 |
| Oas1f     | -----                                                                                                                            | AF481733  |
| Oas1h     | -----                                                                                                                            | BAB84130  |
| OAS1      | -----                                                                                                                            | CAA26633  |
| OAS2C     | -----                                                                                                                            | AAA60606  |
| Oas2C     | -----                                                                                                                            | BAB84135  |
| OAS3C     | -----                                                                                                                            | AAD28543  |
| Oas3C     | -----                                                                                                                            | BAB84134  |
| Oas11     | LSQGYLGLQLRSFQEPGGERQLIRSHCTLAYYIFCDTHICLLDTISPEIQVFNKPDGRSHAYAIHPLDYVLNLKQOIEDRQGLRCQERLEFQGHILEDFDFKSYGIDQSVTVILSKTTEGAAPFVPS  | BAB84133  |
| OASL      | RTRGYSLQLRSFQEPGGERQLIRSHCTLAYYIFCDTHICLLDTISPEIQVFNKPDGRSHAYAIHPLDYVLNLKQOIEDRQGLRCQERLEFQGHILEDFDFKSYGIDQSVTVILSKTTEGAAPFVPS   | CAA12396  |
| Oas12     | REKFNFGGELRISFQEPGGERQLIRSHCTLAYYIFCDTHICLLDTISPEIQVFNKPDGRSHAYAIHPLDYVLNLKQOIEDRQGLRCQERLEFQGHILEDFDFKSYGIDQSVTVILSKTTEGAAPFVPS | AAD02818  |
| OAS2N     | -----                                                                                                                            | AAA60606  |
| Oas2N     | -----                                                                                                                            | BAB84135  |
| OAS3N     | AGSKPPSCPAPGPTAEPASYPVPG-----                                                                                                    | AAD28543  |
| Oas3N     | ERSQKPSNSAPGFPEAATKIIPAMPNPSANKTRKIRKKAHPKTVQEAAALDSSSHVITQSTASSHMPDRSSISTAGSR-----                                              | BAB84134  |
| OAS3M     | -----                                                                                                                            | AAD28543  |
| Oas3M     | -----                                                                                                                            | BAB84134  |
